# Supplementary material
Source: PubMed Central journal article supplement (PMC8814981)

## Supplementary Online Content

Bloomfield D, D'Andrea E, Nagar S, Kesselheim A. Characteristics of clinical trials evaluating biosimilars in the treatment of cancer: a systematic review and meta-analysis. *JAMA Oncol*. Published online February 3, 2022. doi:10.1001/jamaoncol.2021.7230

**eMethods.** Search Strategy for the Systematic Review and Meta-Analysis

**eTable 1.** Oncology Biosimilar Efficacy Trials

**eTable 2.** Quality Assessment Criteria and Risk of Bias Assessment

**eFigure 1.** Funnel Plot Analysis

**eTable 3.** Begg's Test for Small-Study Effects

**eTable 4.** Egger's Test for Small-Study Effects

**eFigure 2.** Funnel Plot by Disease-Measurement Subgroup

**eFigure 3.** Sensitivity Analysis for ORR, mCRC Removing Romera et al

**eFigure 4.** Sensitivity Analysis for pCR, ERBB2+ Early Breast Cancer Removing Pivot et al and Lammers et al

**eFigure 5.** Sensitivity Analysis for ORR, DLBCL Removing Viswabandya et al

This supplementary material has been provided by the authors to give readers additional information about their work.

## **eMethods.** Search Strategy for the Systematic Review and Meta-Analysis

Our search strategy aimed to capture studies that undertook a comparative efficacy analysis of cancer biosimilars for one of three reference cancer biologics: bevacizumab, trastuzumab, and rituximab. The search was conducted in April 2021 and limited to English-language randomized clinical trials and observational studies. The search was conducted in Embase, Pubmed/Medline, and Clinicaltrials.gov.

Search terms for this study were designed to optimize both the search's sensitivity and precision to identify as many relevant publications as possible. These terms were designed to account for the variability in the types of language used in publications while yielding as many relevant results as possible. A common search term was used in Embase and Pubmed/Medline, while a different, simplified search term was used in Clinicaltrials.gov.

### **Search Term Used for Embase and Pubmed/Medline**

The search term used in Embase and Pubmed/Medline was designed to ensure both a sensitive and precise search for this study, maximizing the number of relevant results. First, the search term was designed to ensure that drugs in the studies shared a common indication for various types of cancer, so the following terms were added:

*("cancer" OR "oncology")*

The next element of the search term was designed to ensure that studies found included biosimilars and their reference products. Thus, the following string was added:

*"biosimilar" AND ("reference" OR "originator" OR "brand name" OR "brand-name")*

We then added terms to ensure studies found by the search were comparative analyses of biosimilars and their reference products. Hence, we added the following:

*("compared" OR "comparison" OR "compare" OR "contrast" OR "versus" OR "equivalence" OR "switching" OR "equivalent" OR "bioequivalence" OR "bioequivalence" OR "comparing")*

Lastly, we wanted to ensure that all studies found analyzed one of the three specified biologics (Rituximab, Trastuzumab, and Bevacizumab) and a relevant biosimilar. Hence, we added the following terms to limit results to these drugs:

*((("Rituxan" OR "Rituximab") OR ("Riabni" OR "Ruxience" OR "Truxima" OR "rituximab-arrx" OR "rituximab-pvvr" OR "rituximab-abbs")) OR (("Herceptin" OR "trastuzumab") OR ("Herzuma" OR "trastuzumab-pkrb" OR "Kanjinti" OR "trastuzumab-anns" OR "Ogivri" OR "trastuzumab-dkst" OR "Ontruzant" OR "trastuzumab-dttb" OR "Trazimera" OR "trastuzumab-qyyp")) OR (("Avastin" OR "bevacizumab") OR ("Mvasi" or "bevacizumab-awwb" OR "Zirabev" OR "bevacizumab-bvzr")))*

We joined each of these smaller terms with the AND operator to create the main search term:

*("cancer" OR "oncology") AND "biosimilar" AND ("reference" OR "originator" OR "brand name" OR "brand-name") AND ("compared" OR "comparison" OR "compare" OR "contrast" OR "versus" OR "equivalence" OR "switching" OR "equivalent" OR "bioequivalence" OR "bioequivalence" OR "comparing") AND ((( "Rituxan" OR "Rituximab") OR ("Riabni" OR "Ruxience" OR "Truxima" OR "rituximab-arrx" OR "rituximab-pvvr" OR "rituximab-abbs")) OR (("Herceptin" OR "trastuzumab") OR ("Herzuma" OR "trastuzumab-pkrb" OR "Kanjinti" OR "trastuzumab-anns" OR "Ogivri" OR "trastuzumab-dkst" OR "Ontruzant" OR "trastuzumab-dttb" OR "Trazimera" OR "trastuzumab-qyyp")) OR (("Avastin" OR "bevacizumab") OR ("Mvasi" or "bevacizumab-awwb" OR "Zirabev" OR "bevacizumab-bvzr" )))*

We ran this search in Pubmed/Medline and Embase, limiting results to randomized clinical trials and observational studies. This search yielded the studies, which were then screened and later used in this analysis.

### **Search Term Used for Clinicaltrials.gov**

The search term used in Clinicaltrials.gov was a simplified version of the search term used in Pubmed/Medline and Embase in order to better fit the search function provided on that website. The goal of the search term was once again to ensure an optimally sensitive and precise search with as many relevant results as possible.

The search term first was designed to ensure studies focused on one of the three cancer biologic medications. Hence, the string began:

*(Rituximab OR Trastuzumab OR Bevacizumab)*

Next, the string was appended with additional terms to ensure that the search would yield studies that undertook comparative efficacy analyses of biosimilars for the three relevant biologics. As a result, the following substring was appended to the main search term:

*Biosimilar AND ("compared" OR "comparison" OR "compare" OR "contrast" OR "versus" OR "equivalence" OR "switching" OR "equivalent" OR "equivalence" OR "bioequivalence" OR "comparing")*

The two smaller strings were then joined by an AND operator to create the final string:

*(Rituximab OR Trastuzumab OR Bevacizumab) AND Biosimilar AND ("compared" OR "comparison" OR "compare" OR "contrast" OR "versus" OR "equivalence" OR "switching" OR "equivalent" OR "equivalence" OR "bioequivalence" OR "comparing")*

The final string was entered into the Advanced Search feature provided in Clinicaltrials.gov. The additional parameter of "Recruitment: Completed" was selected in order to ensure studies had finished recruiting patients and could at least report intermediate results.

**eTable 1.** Oncology Biosimilar Efficacy Trials

| First Author      | Year | Design & Blinding | Cancer & Stage                                          | Exposure  | Reference   | Total Study Patients | Age, median (range or IQR) or mean (SD) | Gender                 | ECOG perf. status                        |
|-------------------|------|-------------------|---------------------------------------------------------|-----------|-------------|----------------------|-----------------------------------------|------------------------|------------------------------------------|
| Kaplanov et al.   | 2014 | open-label RCT    | Follicular lymphoma                                     | BCD-020   | rituximab   | 92                   | Median, Range: 57.5 (50 - 65)           |                        | 0-2: 100%                                |
| Filon et al.      | 2015 | double-blind RCT  | Advanced nonsquamous non-small cell lung cancer (NSCLC) | BCD-021   | bevacizumab | 138                  | Mean, SD: 58.23 (8.61)                  | F: 36.6%<br>M: 63.4%   | 0-2: 100%                                |
| Stebbing et al.   | 2017 | double-blind RCT  | Early HER2-positive breast cancer                       | CT-P6     | trastuzumab | 549                  | Median, Range: 53 (24–78)               | F: 100%                | 0: 88%<br>1: 12%                         |
| Jurczak et al.    | 2017 | double-blind RCT  | Advanced follicular lymphoma                            | GP2013    | rituximab   | 629                  | Mean, SD: 56.9 (11.79)                  | F: 58%<br>M: 42%       | 0: 57%<br>1: 40%<br>2: 2%<br>Missing: 1% |
| Apsangikar et al. | 2017 | open-label RCT    | Metastatic colorectal cancer (mCRC)                     | BevacRel  | bevacizumab | 119                  | Mean, SD: 48.1 (11.94)                  | F: 34.45%<br>M: 65.55% | 0: 28.57%<br>1: 63.03%<br>2: 8.40%       |
| Rugo et al.       | 2017 | double-blind RCT  | Metastatic HER2-positive breast cancer                  | MYL-1401O | trastuzumab | 500                  | Median, Range: 55.0 (26-79)             | F: 100%                | 0: 51.4%<br>1: 46.6%<br>2: 2.0%          |

| First Author         | Year | Design & Blinding | Cancer & Stage                      | Exposure           | Reference   | Total Study Patients | Age, median (range or IQR) or mean (SD) | Gender                 | ECOG perf. status       |
|----------------------|------|-------------------|-------------------------------------|--------------------|-------------|----------------------|-----------------------------------------|------------------------|-------------------------|
| Kim et al.           | 2017 | double-blind RCT  | Advanced follicular lymphoma        | CT-P10             | rituximab   | 140                  | Median, Range: 57.5 (26 - 85)           | M: 45%<br>F: 55%       |                         |
| von Minckwitz et al. | 2018 | double-blind RCT  | early HER2-positive breast cancer   | ABP 980            | trastuzumab | 725                  | Median, Range: 53 (46–60)               | F: 100%                | 0: 82%<br>1: 18%        |
| Pivot et al.         | 2018 | double-blind RCT  | Early HER2-positive breast cancer   | SB3                | trastuzumab | 875                  | Median, Range: 51 (24-65)               | F: 100%                | 0: 83.8%<br>1: 16.2%    |
| Advani et al.        | 2018 | open-label RCT    | Metastatic colorectal cancer (mCRC) | Hetero-Bevacizumab | bevacizumab | 111                  | Median: 48*<br>*Range unavaliable       | F: 38.89%<br>M: 61.11% |                         |
| Lammers et al.       | 2018 | double-blind RCT  | Eearly HER2-positive breast cancer  | PF-05280014        | trastuzumab | 226                  | Mean, SD: 52.6 (12.3)                   | F: 100%                |                         |
| Ogura et al.         | 2018 | double-blind RCT  | Early follicular lymphoma           | CT-P10             | rituximab   | 258                  | Mean, SD: 57.7 (12.7)                   | M: 51%<br>F: 49%       | 0: 84%<br>1: 16%        |
| Romera et al.        | 2018 | open-label RCT    | Metastatic colorectal cancer (mCRC) | BEVZ92             | bevacizumab | 142                  | Median, Range: 56.3 (29-83)             | M:57%<br>F:43%         | 0: 10%<br>1:83%<br>2:7% |

| First Author       | Year | Design & Blinding | Cancer & Stage                                          | Exposure      | Reference   | Total Study Patients | Age, median (range or IQR) or mean (SD) | Gender               | ECOG perf. status                          |
|--------------------|------|-------------------|---------------------------------------------------------|---------------|-------------|----------------------|-----------------------------------------|----------------------|--------------------------------------------|
| Toogeh et al.      | 2018 | double-blind RCT  | Chronic lymphocytic leukemia (CLL)                      | Zytux         | rituximab   | 70                   | Mean, SD: 57.94 (8.44)                  | M: 80%<br>F:20%      |                                            |
| Pegram et al.      | 2019 | double-blind RCT  | Metastatic HER2-positive breast cancer                  | PF-05280014   | trastuzumab | 707                  | Median, Range: 54.0 (19-85)             | F: 100%              | 0: 53.7%<br>1: 41.9%<br>2: 4.4%            |
| Thatcher et al.    | 2019 | double-blind RCT  | Advanced nonsquamous non-small cell lung cancer (NSCLC) | ABP 215       | bevacizumab | 642                  | Mean, SD: 61.6 (8.98)                   | M: 59.8%<br>F: 40.2% | 0: 38.7%<br>1: 61.3%                       |
| Reinmuth et al.    | 2019 | double-blind RCT  | Advanced nonsquamous non-small cell lung cancer (NSCLC) | PF-06439535   | bevacizumab | 719                  | Median, Range: 62.0 (25-87)             | M: 66.2%<br>F: 33.8% | 0: 29.3%<br>1:70.4 %                       |
| Candelaria et al.  | 2019 | double-blind RCT  | Diffuse large B-cell lymphoma (DLBCL)                   | RTXM83        | rituximab   | 272                  | Median, IQR: 51 (40.0,58.0)             | F: 43%<br>M: 57%     | 0: 62%<br>1: 38%<br>Missing: <1%           |
| Viswabandya et al. | 2019 | double-blind RCT  | Diffuse large B-cell lymphoma (DLBCL)                   | DRL-rituximab | rituximab   | 151                  | Mean, SD: 47.2 (11.75)                  | F: 35.5%<br>M: 64.5% |                                            |
| Poddunaya et al.   | 2019 | open-label RCT    | Follicular lymphoma                                     | BCD-020       | rituximab   | 174                  | Median, IQR: 58.0 (49,64)*              | F: 52.8%<br>M: 47.2% | 0: 23.6%,<br>1: 66.3%,<br>2: 7.9%, 3: 2.2% |

| First Author        | Year | Design & Blinding | Cancer & Stage                                          | Exposure    | Reference   | Total Study Patients | Age, median (range or IQR) or mean (SD) | Gender                 | ECOG perf. status                |
|---------------------|------|-------------------|---------------------------------------------------------|-------------|-------------|----------------------|-----------------------------------------|------------------------|----------------------------------|
| Reck et al.         | 2019 | double-blind RCT  | Advanced nonsquamous non-small cell lung cancer (NSCLC) | SB8         | bevacizumab | 763                  |                                         |                        |                                  |
| Yang et al.         | 2019 | double-blind RCT  | Advanced nonsquamous non-small cell lung cancer (NSCLC) | IBI305      | bevacizumab | 450                  | Mean, SD: 57.4 (8.98)                   | M: 63.3%<br>F: 36.7%   | 0: 24.9%<br>1: 75.1%             |
| Sharman et al.      | 2020 | double-blind RCT  | Follicular lymphoma                                     | PF-05280586 | rituximab   | 394                  | Mean, SD: 58.7 (12.1)                   | F: 56.1%<br>M: 43.9%   | 0: 87.2%<br>1: 12.8%             |
| Rezvani et al.      | 2020 | double-blind RCT  | Metastatic colorectal cancer (mCRC)                     | BE1040V     | bevacizumab | 126                  | Mean, SD: 56.26 (11.94)                 | F: 62.20%<br>M: 37.80% | 0 or 1: 100%                     |
| Shi et al.          | 2020 | double-blind RCT  | Diffuse large B-cell lymphoma (DLBCL)                   | HLX01       | rituximab   | 402                  | Median, IQR: 54 (46, 61)                | F: 40.7%<br>M: 59.3%   | 0: 37.7%<br>1: 47.2%<br>2: 15.1% |
| Niederwieser et al. | 2020 | double-blind RCT  | Follicular lymphoma                                     | ABP 798     | rituximab   | 256                  | Median: 58.5 (24-84)                    | F: 50.8%<br>M: 49.2%   | 0: 84.8%<br>1: 15.2%             |
| Hii et al.          | 2020 | double-blind RCT  | Early HER2-positive breast cancer                       | HD201       | trastuzumab | 502                  |                                         |                        |                                  |

| First Author   | Year | Design & Blinding | Cancer & Stage                                          | Exposure | Reference   | Total Study Patients | Age, median (range or IQR) or mean (SD)           | Gender              | ECOG perf. status      |
|----------------|------|-------------------|---------------------------------------------------------|----------|-------------|----------------------|---------------------------------------------------|---------------------|------------------------|
| Alexeev et al. | 2020 | double-blind RCT  | Metastatic HER2-positive breast cancer                  | BCD-022  | trastuzumab | 225                  | Mean, SD: 50.63 (10.415)                          | F: 100%             | 0-2: 100%              |
| Millan et al.  | 2020 | double-blind RCT  | Advanced nonsquamous non-small cell lung cancer (NSCLC) | MB02     | bevacizumab | 627                  | Median, Range: 61.0 (55.0 - 67.0)                 | M:61.1%<br>F: 38.9% |                        |
| Qin et al.     | 2021 | double-blind RCT  | Metastatic colorectal cancer (mCRC)                     | HLX04    | bevacizumab | 677                  |                                                   |                     | 0: 32.5% ;<br>1: 67.5% |
| Xu et al.      | 2021 | double-blind RCT  | Metastatic HER2-positive breast cancer                  | HLX02    | trastuzumab | 649                  | Median, Range: 54 (30 - 80). Mean, SD: 53.6 (9.7) | F: 100%             | 0: 42.6%<br>1: 57.4%   |



**eTable 2.** Quality Assessment Criteria and Risk of Bias Assessment

| first author         | year | random sequence generation (selection bias) | allocation concealment (selection bias) | blinding of participants and personnel (performance bias) | blinding of outcome assessors (performance bias) | incomplete outcome data (attrition bias) | selective outcome reporting (reporting bias) | other potential bias | Overall assessment:risk of bias |
|----------------------|------|---------------------------------------------|-----------------------------------------|-----------------------------------------------------------|--------------------------------------------------|------------------------------------------|----------------------------------------------|----------------------|---------------------------------|
| Kaplanov et al.      | 2014 | ?                                           | -                                       | -                                                         | -                                                | -                                        | +                                            | +                    | high                            |
| Filon et al.         | 2015 | ?                                           | ?                                       | ?                                                         | ?                                                | +                                        | +                                            | +                    | unclear                         |
| Stebbing et al.      | 2017 | +                                           | +                                       | +                                                         | +                                                | +                                        | +                                            | +                    | low                             |
| Jurczak et al.       | 2017 | +                                           | +                                       | +                                                         | +                                                | +                                        | +                                            | +                    | low                             |
| Apsangikar et al.    | 2017 | ?                                           | -                                       | -                                                         | -                                                | ?                                        | +                                            | +                    | high                            |
| Rugo et al.          | 2017 | +                                           | +                                       | +                                                         | +                                                | +                                        | +                                            | +                    | low                             |
| Kim et al.           | 2017 | ?                                           | +                                       | +                                                         | +                                                | +                                        | +                                            | +                    | low                             |
| von Minckwitz et al. | 2018 | +                                           | +                                       | +                                                         | +                                                | +                                        | +                                            | +                    | low                             |
| Pivot et al.         | 2018 | +                                           | +                                       | +                                                         | ?                                                | +                                        | +                                            | +                    | low                             |
| Pegram et al.        | 2018 | +                                           | +                                       | +                                                         | +                                                | +                                        | +                                            | +                    | low                             |
| Advani et al.        | 2018 | +                                           | ?                                       | -                                                         | +                                                | -                                        | +                                            | +                    | unclear                         |
| Lammers et al.       | 2018 | +                                           | ?                                       | +                                                         | +                                                | +                                        | +                                            | +                    | low                             |
| Ogura et al.         | 2018 | +                                           | +                                       | +                                                         | +                                                | +                                        | +                                            | +                    | low                             |
| Romera et al.        | 2018 | +                                           | -                                       | -                                                         | ?                                                | +                                        | +                                            | +                    | unclear                         |
| Toogeh et al.        | 2018 | +                                           | +                                       | +                                                         | +                                                | +                                        | +                                            | +                    | low                             |
| Thatcher et al.      | 2019 | +                                           | +                                       | ?                                                         | +                                                | +                                        | +                                            | +                    | low                             |
| Reinmuth et al.      | 2019 | +                                           | +                                       | +                                                         | -                                                | +                                        | +                                            | +                    | low                             |
| Candelaria et al.    | 2019 | +                                           | +                                       | +                                                         | -                                                | +                                        | +                                            | +                    | low                             |
| Viswabandya et al.   | 2019 | +                                           | ?                                       | +                                                         | ?                                                | +                                        | +                                            | +                    | low                             |
| Poddunaya et al.     | 2019 | ?                                           | ?                                       | -                                                         | -                                                | +                                        | +                                            | +                    | unclear                         |
| Reck et al.          | 2019 | ?                                           | +                                       | +                                                         | +                                                | -                                        | +                                            | +                    | unclear                         |
| Yang et al.          | 2019 | +                                           | +                                       | +                                                         | +                                                | +                                        | +                                            | +                    | low                             |

|                     |      |   |   |   |   |   |   |   |         |
|---------------------|------|---|---|---|---|---|---|---|---------|
| Sharman et al.      | 2020 | + | ? | + | ? | + | + | + | low     |
| Rezvani et al.      | 2020 | + | + | + | + | + | + | + | low     |
| Shi et al.          | 2020 | ? | ? | + | ? | + | + | + | unclear |
| Niederwieser et al. | 2020 | + | + | + | + | ? | + | + | low     |
| Hii et al.          | 2020 | ? | ? | + | ? | - | + | + | unclear |
| Alexeev et al.      | 2020 | ? | ? | + | + | + | + | + | low     |
| Millan et al.       | 2020 | ? | ? | + | ? | - | + | + | unclear |
| Qin et al.          | 2021 | + | + | + | + | + | + | + | low     |
| Xu et al.           | 2021 | + | + | + | + | + | + | + | low     |

**eFigure 1.** Funnel Plot Analysis

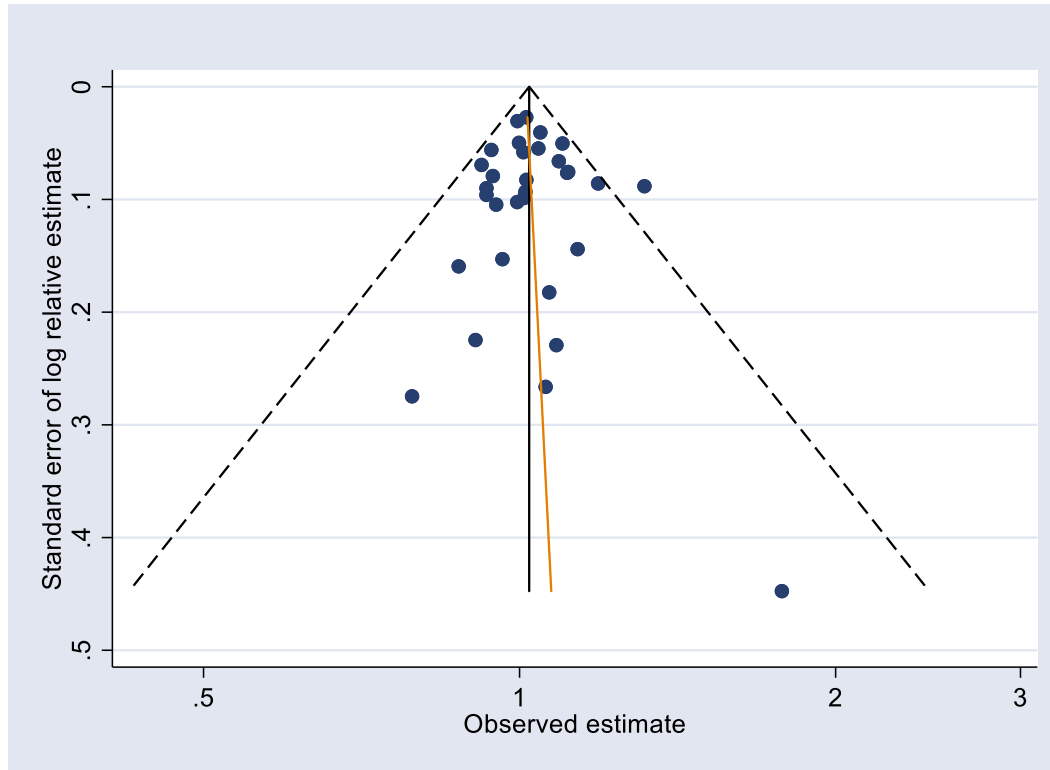

Figure Legend: Funnel plot showing symmetrical distribution of studies (full blue circles) indicating absence of publication bias. The full black line represents the expected pooled estimate, while the dashed lines represent upper and lower confidence intervals, respectively. The red line represents the observed pooled estimate across all the trials.

**eTable 3.** Begg's Test for Small-Study Effects

| <b>Rank correlation between standardized intervention effect and its standard error</b> |       |
|-----------------------------------------------------------------------------------------|-------|
| <b>adj. Kendall's Score (P-Q)</b>                                                       | 5     |
| <b>Std. Dev. of Score</b>                                                               | 58.84 |
| <b>Number of Studies</b>                                                                | 31    |
| <b>Z (continuity corrected)</b>                                                         | 0.07  |
| <b>Pr &gt;  z (continuity corrected)</b>                                                | 0.946 |

Interpretation: Begg and Mazumdar's test for rank correlation gave a p-value of 0.946, no suggesting evidence of publication bias.

**eTable 4.** Egger's Test for Small-Study Effects

| Number of studies = 31 |       |           | Root MSE = 1.03 |       |                    |             |
|------------------------|-------|-----------|-----------------|-------|--------------------|-------------|
| Std_Eff                | Coef. | Std. Err. | t               | P> t  | 95% Conf. Interval |             |
|                        |       |           |                 |       | Lower Bound        | Upper Bound |
| slope                  | .014  | .023      | 0.60            | 0.550 | -.033              | .061        |
| bias                   | .123  | .351      | 0.35            | 0.728 | -.595              | .842        |

Test of H0: no small-study effects      P = 0.728

Interpretation: Egger's test for a regression intercept gave a p-value of 0.728, no suggesting evidence of publication bias.

**eFigure 2.** Funnel Plot by Disease-Measurement Subgroup

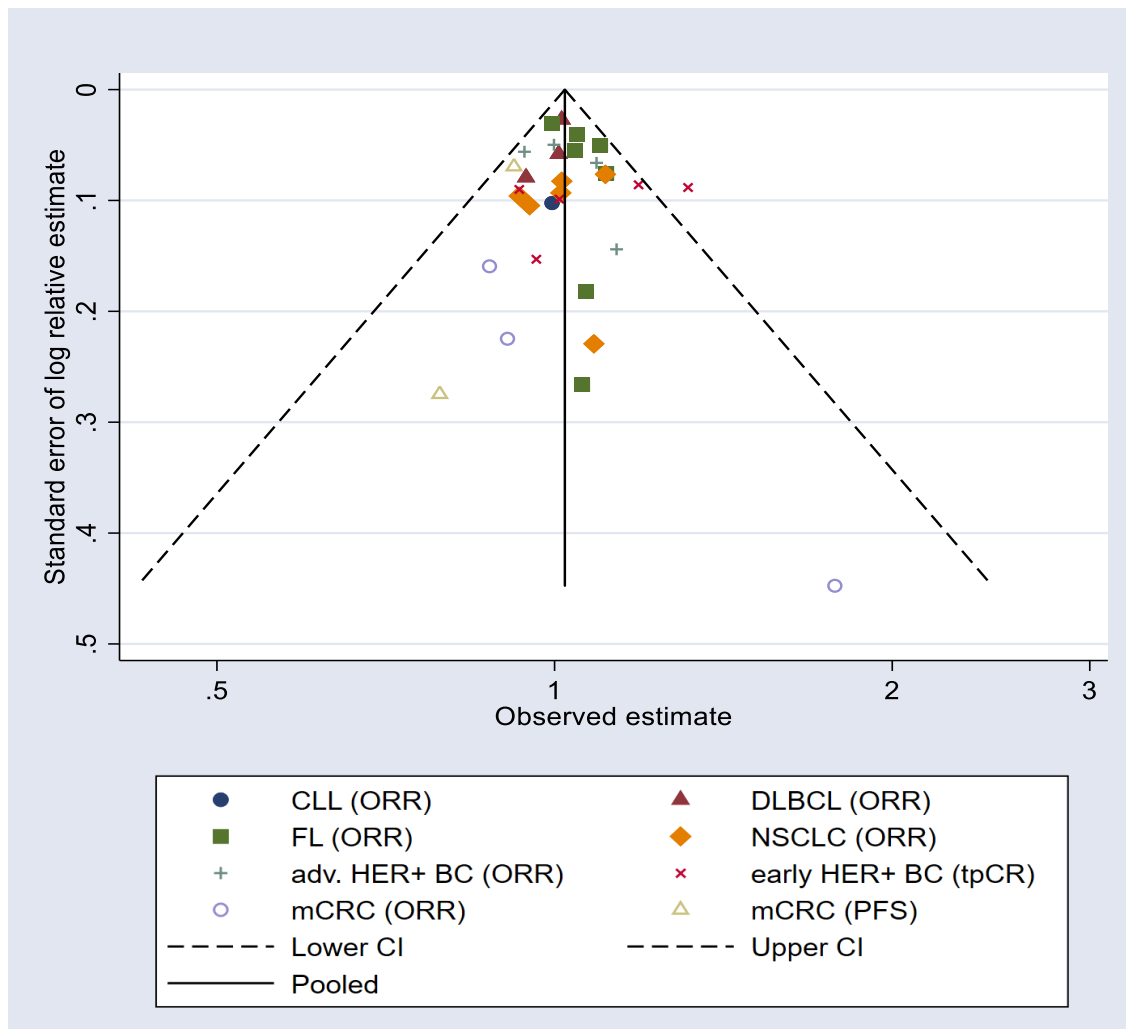

Figure Legend: Funnel plot showing symmetrical distribution of studies by cancer type and drug class. The full black line represents the expected pooled estimate, while the dashed lines represent upper and lower confidence intervals, respectively

**eFigure 3.** Sensitivity Analysis for ORR, mCRC Removing Romera et al.

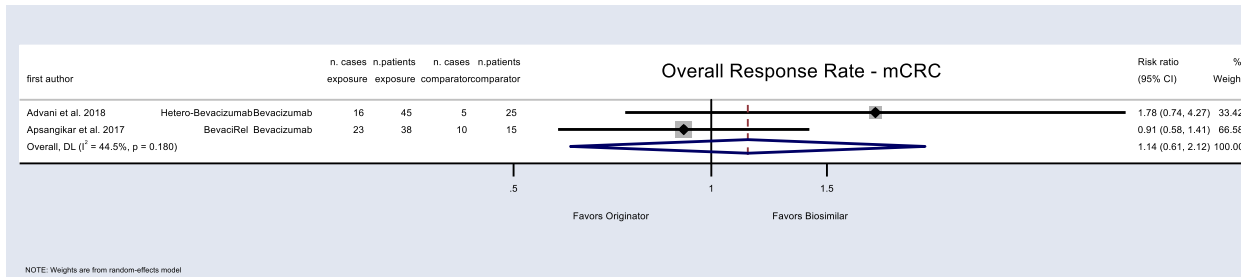

**eFigure 4.** Sensitivity Analysis for pCR, ERBB2+ Early Breast Cancer Removing Pivot et al. and Lammers et al.

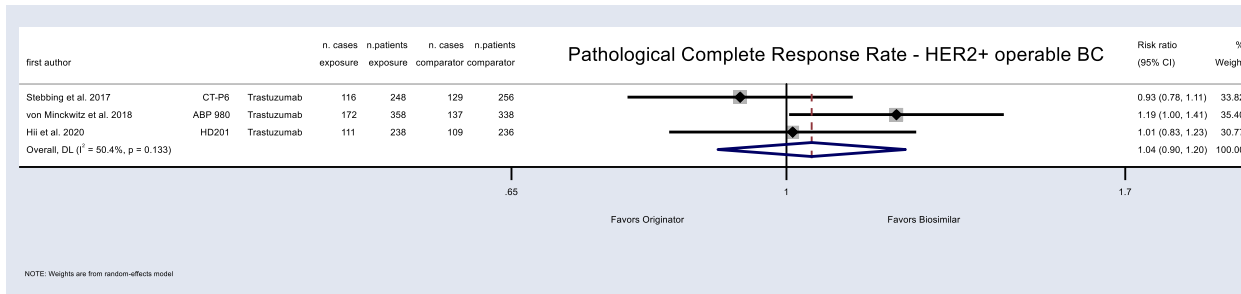



**eFigure 5.** Sensitivity Analysis for ORR, DLBCL Removing Viswabandya et al.

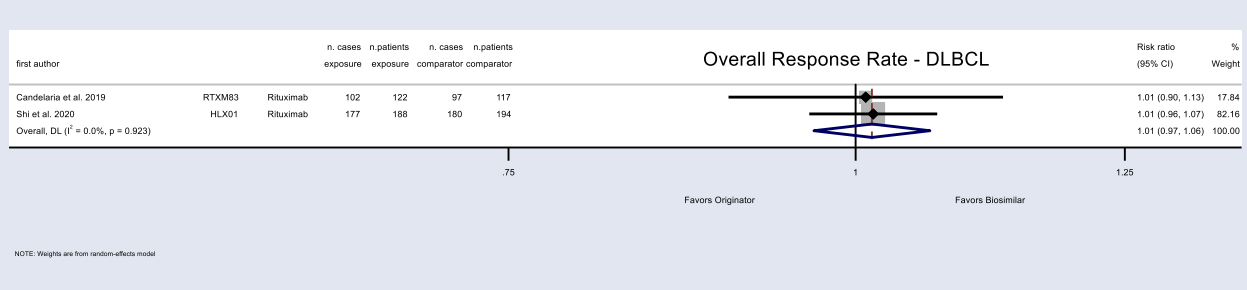

Supplement: jamaoncol-e217230-s001.pdf [file jamaoncol-e217230-s001.pdf]
